# Supplementary material for: Negligible concentration quenching in photoluminescent nanocrystals with high photoactive rare-earth concentrations: silica–(Tb,Ce)PO4 transparent glass-ceramic green phosphors
Source: Royal Society of Chemistry journal article supplement (doi:10.1039/d0tc06043g), 2021-01-01
Supplement: d0tc06043g1.pdf [file d0tc06043g1.pdf]

Electronic Supplementary Information for:

**Negligible concentration quenching in photoluminescent nanocrystals with high photoactive rare-earth concentrations: silica-(Tb,Ce)PO<sub>4</sub> transparent glass-ceramic green phosphors**

Rena Iwasaki<sup>a</sup> and Koichi Kajihara<sup>a\*</sup>

<sup>a</sup>Department of Applied Chemistry for Environment, Graduate School of Urban Environmental Sciences, Tokyo Metropolitan University, 1-1 Minami-Osawa, Hachioji, Tokyo 192-0397, Japan

## Experimental procedure

A dilute aqueous solution of nitric acid was added to 25 mmol (5.2 g) of tetraethoxysilane (TEOS, Shin-Etus Chemical) at a TEOS : H<sub>2</sub>O : HNO<sub>3</sub> molar ratio of 1 : 1.83–1.87 (=  $x_1$ ) : 0.002 and stirred for 55 min at 20 °C in a sealed plastic container to form a clear solution. Triphenylphosphine oxide (TPPO, Tokyo Chemical Industry) was added and stirred another 5 min to form a clear solution. This solution was further mixed with an aqueous solution of ammonium acetate (AcONH<sub>4</sub>, Wako Pure Chemical), terbium acetate ((AcO)<sub>3</sub>Tb, 99.9%, Wako Pure Chemical), cerium acetate ((AcO)<sub>3</sub>Ce, 99.99 %, Rare Metallic), and neodymium acetate ((AcO)<sub>3</sub>Nd, 99.9 %, Wako Pure Chemical). The overall TEOS : H<sub>2</sub>O : HNO<sub>3</sub> : AcONH<sub>4</sub> : (AcO)<sub>3</sub>Tb + (AcO)<sub>3</sub>Ce + (AcO)<sub>3</sub>Nd : TPPO molar ratio was 1 : 10 (=  $x_1 + x_2$ ) : 0.002 : 0.01 : 0.01 (=  $z_{RE} = z_{Tb} + z_{Ce} + z_{Nd}$ ) :  $z_P$ . The molar ratio of RE acetates was fixed at  $z_{Tb} : z_{Ce} = 98 : 2$  (2 at % Ce) for the Nd-free samples and  $z_{Tb} : z_{Ce} : z_{Nd} = 97 : 2 : 1$  (2 at % Ce and 1 at % Nd) for the Nd-doped sample. After stirring for 2 min, the stir bar was removed and the resultant clear solution was maintained at 20 °C until gelation. The gel was aged for 1 day at 60 °C. The container was then opened, solvent phase was discarded, and the wet gel was gently dried at 60 °C. The dried gels were sintered in a tube furnace heated at a rate of 200 °C h<sup>-1</sup> and held at 1200 °C up to 1 h. The sintering atmosphere was changed from air to He at 600 °C. Hydrogen reduction was conducted by additionally introducing a small amount (5 %) of H<sub>2</sub> between 800 and 1200 °C. Two parallel faces of sintered glasses were polished to an optical finish.

Optical absorption and Raman spectra were acquired using a conventional spectrometer (U-4100, Hitachi) and Raman spectrometer (NRS-4500, JASCO, excitation at 532 nm), respectively. Photoluminescence (PL) spectra were recorded using an integrating sphere (4P-GPS-033-SL, Labsphere) connected to a fluorophotometer (F-7000, Hitachi) used as a light source and a CCD spectrometer (BLACK-Comet, StellarNet). PL intensity was calibrated using a photodiode power meter (PD300R-UV, OPHIR). The areas of the emission and excitation bands in the PL spectra obtained by directly illuminating the sample define the number of emitted photons,  $N_{em}$ , and the number of photons not absorbed by the sample,  $N_{ex}$ , respectively. The area of the excitation band for an empty sphere corresponds to the number of photons from the light source,  $N_{ex}^0$ . Absorption factor ( $f_A$ ), internal quantum efficiency (IQE), and external quantum efficiency (EQE) were defined as  $f_A = (N_{ex}^0 - N_{ex})/N_{ex}^0$ ,  $IQE = N_{em}/(N_{ex}^0 - N_{ex})$ , and  $EQE = f_A \times IQE = N_{em}/N_{ex}^0$ , respectively. The experimental uncertainties of  $f_A$ , IQE, and EQE were  $\pm 2$  %. The PL decay curves of the  $^5D_4 \rightarrow ^7F_j$  ( $j = 4, 5$ ) transitions of Tb<sup>3+</sup> ions were recorded using a photomultiplier (R955, Hamamatsu Photonics) covered by a 532 nm long-pass edge filter (LP03-532RU-25, Semrock) and color filter (G545, HOYA), and connected to an oscilloscope. Excitation light from an ultraviolet light-emitting diode ( $\sim 0.35$  mW at  $\sim 290$  nm)

was periodically cut with an optical chopper. In these PL measurements a commercial (La,Tb,Ce)PO<sub>4</sub> green phosphor powder (NP-220-02, Nichia) was used as a reference. Several samples were crushed and subject to observations by a transmission electron microscope (TEM, JEM-3200FS, JEOL, operated at 300 kV).

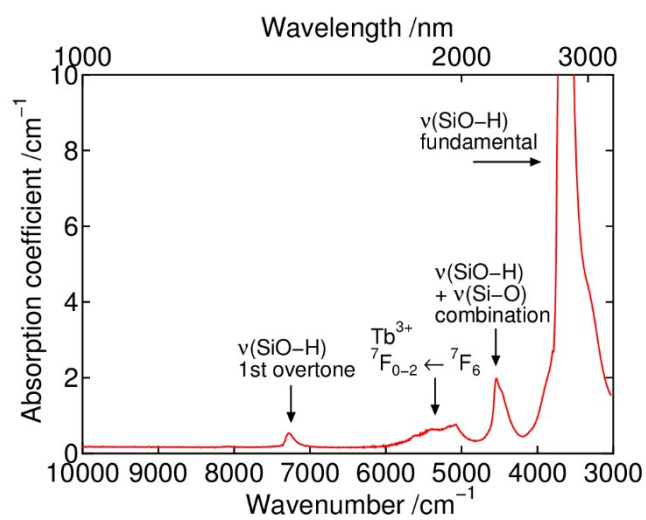

**Fig. S1** Near-infrared optical absorption spectrum of glass-ceramic prepared  $z_P/z_{RE} = 2.0$  and sintered in He-H<sub>2</sub>

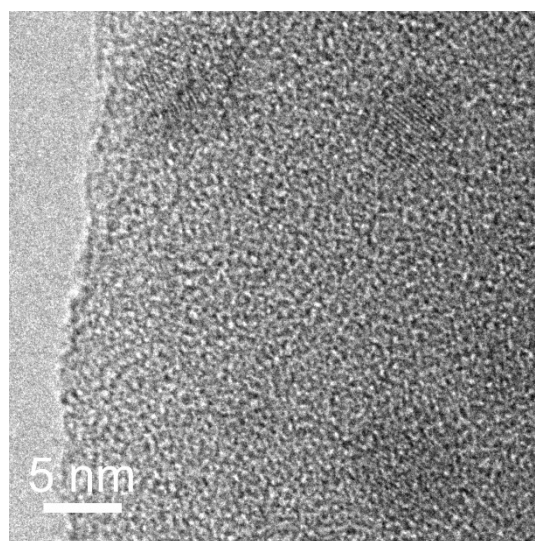

**Fig. S2** TEM image of glass-ceramic prepared at  $z_P/z_{RE} = 2.0$  and sintered in He-H<sub>2</sub>.

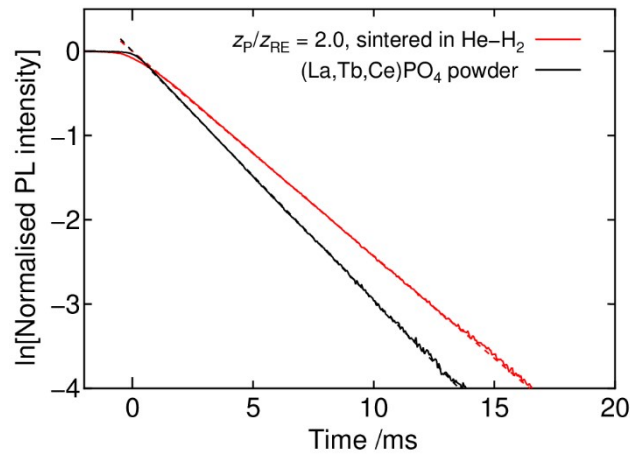

**Fig. S3** PL decay curves of the  ${}^5D_4 \rightarrow {}^7F_j$  ( $j = 4, 5$ ) transitions of  $Tb^{3+}$  ions in glass-ceramic prepared at  $z_p/z_{RE} = 2.0$  and sintered in He-H<sub>2</sub>, and (La,Tb,Ce)PO<sub>4</sub> phosphor powder under excitation at 290 nm. Dashed lines denote single-exponential functions fitted to observed decay curves.

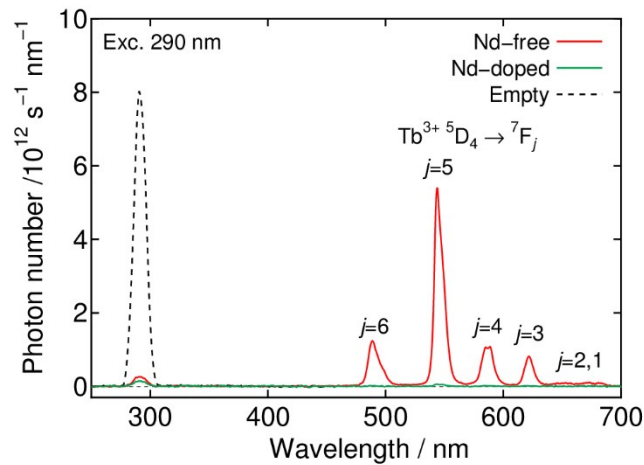

**Fig. S4** PL spectra of silica-(Tb,Ce)PO<sub>4</sub> (Nd-free) and silica-(Tb,Ce,Nd)PO<sub>4</sub> (Nd-doped) glass-ceramics prepared at  $z_{Ce}/z_{RE} = 0.02$  and  $z_p/z_{RE} = 2.0$ , and sintered in He-H<sub>2</sub>. The Nd-doped sample was prepared at  $z_{Nd}/z_{RE} = 0.01$ . The spectra of the Nd-free sample and empty sphere are identical to those shown in Fig. 5.
